# Supplementary material
Source: publisher site journal article supplement (https://www.spandidos-publications.com/86/downloadSupplementary)
Supplement: Supplementary file 1 [file downloadSupplementary]

Figure S1. Viability in H295R cells treated with rosuvastatin. Viability of rosuvastatin-treated H295R cells. Cell viability was measured by WST1 assay. Results are the means  $\pm$  SEM of 8 to 32 independent determinations from 3 different experiments. (A) H295R cells were treated for 24, 48 and 72 h with rosuvastatin (100  $\mu$ M; R100). (B) H295R cells were treated with increasing concentrations of rosuvastatin. Data are the means  $\pm$  SEM of 8 to 32 independent determinations from 3 different experiments. \*\*\*P<0.0001 vs. control (DMSO).

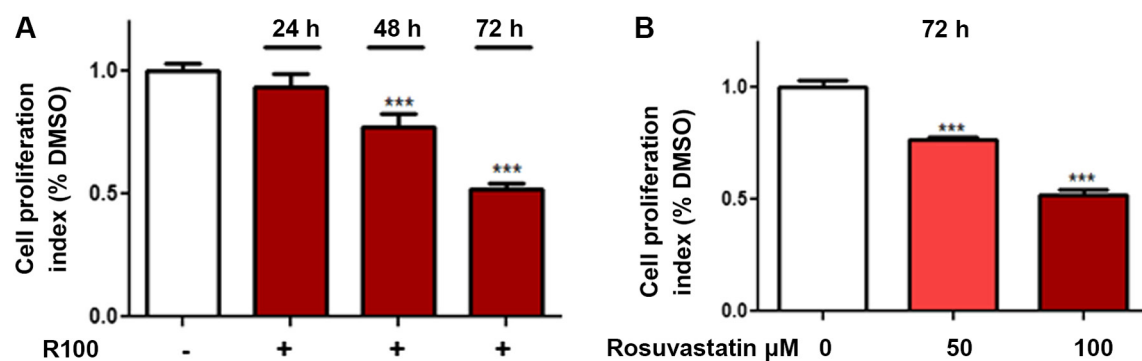

Figure S2. Viability of H295R cells treated with mitotane and/or rosuvastatin at 72 h. Cell viability in mitotane and/or rosuvastatin-treated H295R cells. H295R cells were treated for 72 h with mitotane (50  $\mu$ M or 100  $\mu$ M), rosuvastatin (100  $\mu$ M), alone or in combination. Cell viability was measured by WST1 assay. Results are the means  $\pm$  SEM of 8 to 16 independent determinations from 2 different experiments. Data are the means  $\pm$  SEM of 8 to 32 independent determinations from 3 different experiments. \* $P$ <0.05, \*\* $P$ <0.01 and \*\*\* $P$ <0.001 vs. control (DMSO); ns, not significant.

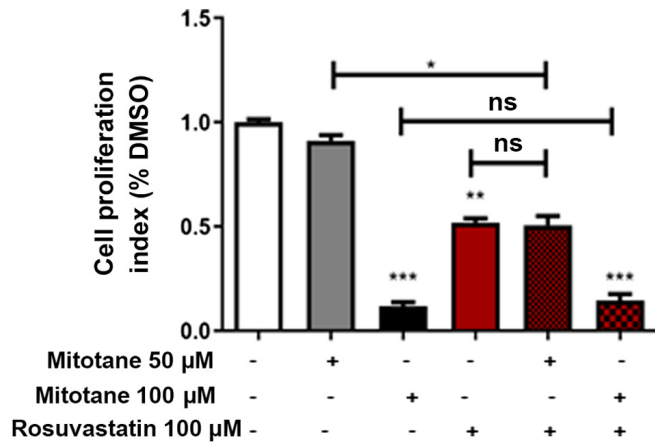

Figure S3. Steroidogenesis in H295R cells treated with mitotane and/or rosuvastatin. H295R cells were treated for 48 h with mitotane (25  $\mu$ M; M25), rosuvastatin (50  $\mu$ M; R50) alone or in combination (R50M25). Steroid concentrations in cell supernatants were measured by LC-MS/MS and are expressed in ng/ml. (A) Cortisol concentration; (B) corticosterone concentration. Data are the means  $\pm$  SEM of 4 independent determinations. \* $P$ <0.05 vs. control (FC or BC); NS, not significant. FC, cortisol control; FM25, cortisol mitotane 25  $\mu$ M; FR50, cortisol rosuvastatin 50  $\mu$ M; FR50M25, cortisol rosuvastatin 50  $\mu$ M and mitotane 25  $\mu$ M; BC, corticosterone control; BM25, corticosterone mitotane 50  $\mu$ M; BR50, corticosterone rosuvastatin 50  $\mu$ M; BR50M25, corticosterone rosuvastatin 50  $\mu$ M and mitotane 25  $\mu$ M.

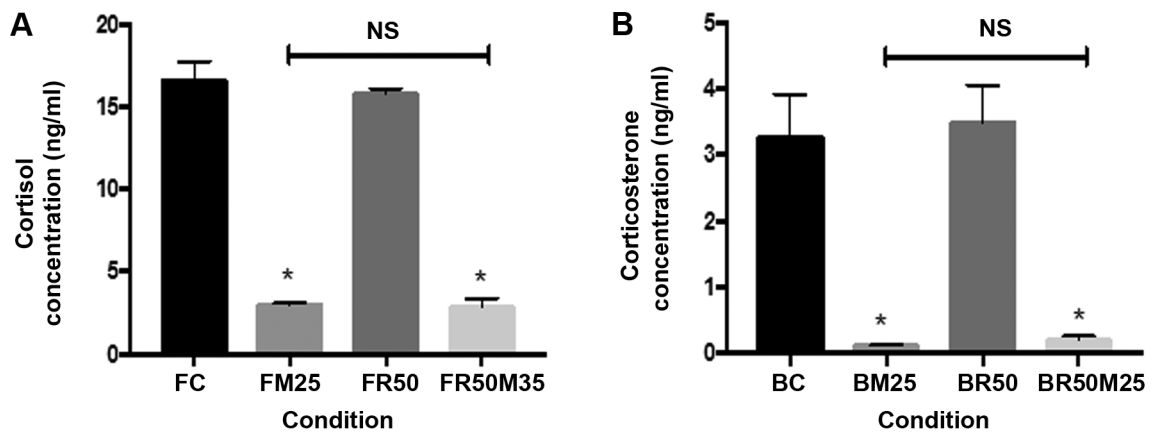

Table SI. Primer sequences.

| Gene           | Amplicon size (bp) | Sense primer                  | Antisense primer                  |
|----------------|--------------------|-------------------------------|-----------------------------------|
| <i>HMGCR</i>   | 119                | 5'-GGACCAACCTACTACCTCAGCAA-3' | 5'-CCATTACGGTCCCACACACA-3'        |
| <i>ABCA1</i>   | 67                 | 5'-CCCTCATTCCAAGCACTTTACG-3'  | 5'-CAATTCTCAGATATTCCAGTGCAAA-3'   |
| <i>CYP11A1</i> | 149                | 5'-CGATTACCGTGGCATCCTCTA-3'   | 5'-AGGTTGCGTGCCATCTCATA-3'        |
| <i>StAR</i>    | 121                | 5'-GCCACAGACTTCGGGAACAT-3'    | 5'-AGTAGCCACGTAAGTTTGGTCTTAGAG-3' |
| <i>18S</i>     | 71                 | 5'-GTGCATGGCCGTTCTTAGTTG-3'   | 5'-CATGCCAGAGTCTCGTTCGTT-3'       |
| <i>36B4</i>    | 75                 | 5'-AGCGCGTCCTGGCATTGTCTGT-3'  | 5'-GGGCAGCAGTGGTGGCAGCAGC-3'      |

bp, base pairs.
